RESEARCH ARTICLE

# Post-exercise hypotension and heart rate variability response after water- and land-ergometry exercise in hypertensive patients

Danilo Sales Bocalini<sup>1,2</sup>, Marco Bergamin<sup>3</sup>, Alexandre Lopes Evangelista<sup>4</sup>, Roberta Luksevicius Rica<sup>1</sup>, Francisco Luciano Pontes, Junior<sup>5</sup>, Aylton Figueira, Junior<sup>1</sup>, Andrey Jorge Serra<sup>6</sup>, Emilly Martinelli Rossi<sup>7</sup>, Paulo José Ferreira Tucci<sup>8</sup>, Leonardo dos Santos<sup>7\*</sup>

**1** Translational Physiology Laboratory, Post-Graduation Program in Physical Education, São Judas Tadeu University, São Paulo, Brazil, **2** Post-Graduation Program in Aging, São Judas Tadeu University, São Paulo, Brazil, **3** Sport and Exercise Medicine Division, Department of Medicine, University of Padova, Padova, Italy, **4** Department of Physical Education of University of São Paulo, São Paulo, Brazil, **5** School of Arts, Sciences and Humanities of University of São Paulo, São Paulo, Brazil, **6** Post-Graduation in Biophotonic applied in Healthy Science of Nove de Julho University, São Paulo, Brazil, **7** Department of Physiological Sciences, Federal University of Espírito Santo, Espírito Santo, Brazil, **8** Cardiology division of Department of Medicine, Federal University of São Paulo - São Paulo Medical School, São Paulo, Brazil

\* [leodossantos@hotmail.com](mailto:leodossantos@hotmail.com)

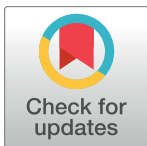

**OPEN ACCESS**

**Citation:** Bocalini DS, Bergamin M, Evangelista AL, Rica RL, Pontes FL, Junior, Figueira A, Junior, et al. (2017) Post-exercise hypotension and heart rate variability response after water- and land-ergometry exercise in hypertensive patients. PLoS ONE 12(6): e0180216. <https://doi.org/10.1371/journal.pone.0180216>

**Editor:** Laszlo Csernoch, University of Debrecen, HUNGARY

**Received:** February 14, 2017

**Accepted:** June 12, 2017

**Published:** June 28, 2017

**Copyright:** © 2017 Bocalini et al. This is an open access article distributed under the terms of the [Creative Commons Attribution License](https://creativecommons.org/licenses/by/4.0/), which permits unrestricted use, distribution, and reproduction in any medium, provided the original author and source are credited.

**Data Availability Statement:** All relevant data are within the paper and its Supporting Information files.

**Funding:** The authors received no specific funding for this work.

**Competing interests:** The authors have declared that no competing interests exist.

## Abstract

### Background

systemic arterial hypertension is the most prevalent cardiovascular disease; physical activity for hypertensive patients is related to several beneficial cardiovascular adaptations. This paper evaluated the effect of water- and land-ergometry exercise sessions on post-exercise hypotension (PEH) of healthy normotensive subjects versus treated or untreated hypertensive patients.

### Methods

Forty-five older women composed three experimental groups: normotensive (N, n = 10), treated hypertensive (TH, n = 15) and untreated hypertensive (UH, n = 20). The physical exercise acute session protocol was performed at 75% of maximum oxygen consumption ( $VO_{2max}$ ) for 45 minutes; systolic (SBP), diastolic (DBP) and mean (MBP) blood pressure were evaluated at rest, peak and at 15, 30, 45, 60, 75 and 90 minutes after exercise cessation. Additionally, the heart rate variability (HRV) was analyzed by R-R intervals in the frequency domain for the assessment of cardiac autonomic function.

### Results

In both exercise modalities, equivalent increases in SBP were observed from rest to peak exercise for all groups, and during recovery, significant PEH was noted. At 90 minutes after the exercise session, the prevalence of hypotension was significantly higher in water- than in the land-based protocol. Moreover, more pronounced reductions in SBP and DBP were observed in the UH patients compared to TH and N subjects. Finally, exercise in the water

was more effective in restoring HRV during recovery, with greater effects in the untreated hypertensive group.

## Conclusion

Our data demonstrated that water-ergometry exercise was able to induce expressive PEH and improve cardiac autonomic modulation in older normotensive, hypertensive treated or hypertensive untreated subjects when compared to conventional land-ergometry.

## Introduction

Systemic arterial hypertension is the most prevalent cardiovascular disease among adults [1], representing numerous deaths per year [2,3]. Similar data have been found in the Brazilian population, showing a 24.4% prevalence of hypertension that increased to 63.2% in the population aged over 65 years old [4,5].

It is well known that pharmacological treatment associated with behavioral-educational approaches both reduce cardiovascular and cerebrovascular morbidity-mortality. However, the major strategy to prevent the impact of hypertension is related to educational lifestyle changes, such as better nutrition, smoking cessation, reduced alcohol consumption and regular physical activity or exercise. Behavioral-educational intervention is a non-pharmacological strategy to control hypertension, and physical activity practice may lead to other behavior modifications (e.g., smoking, alcohol intake, and high fat and/or sugar diets) that impact the morbidity-mortality rate, especially if aerobic exercise [6] is associated with pharmacological treatment [7].

Several cardiovascular adaptations are related to regular physical activity, such as post-exercise hypotension (PEH). Clinically, PEH contributes to blood pressure control as a result of either chronic or acute cardiovascular adaptations in hypertensive and normotensive subjects [8]. Some mechanisms have been described, such as decreased peripheral resistance and sympathetic activity, as well as changes in stroke volume, beta-adrenergic receptors and endothelial modulation [7,9]. Interestingly, different PEH responses are found in each exercise modality such as land walking, cycling, treadmill walking or strength training [9–17] as a result of differences in their metabolic and cardiovascular demand.

Aerobic exercise practice in water is highly recommended for the elderly [18–21] because of the low load and mechanical stress on weight-bearing joints and muscles; water exercises also seem to have the added benefit of a reduction in pain [19]. This type of activity is indicated in rehabilitation and therapeutic procedures and is included in exercise programs for cardiovascular and muscular fitness improvement, particularly for adults and elderly with movement limitations [20,21].

Physiological adaptations are reported in both water- and land-based exercises [21–27], although the magnitudes of the effects are different, mainly as a result of the greater decrease in the sympathetic drive, catecholamine release and peripheral vascular resistance in water-based exercise. Higher suppression in vasopressin and renin-angiotensin systems is also reported in water-based exercise when compared to physical activities on land. Notwithstanding, few studies investigated PEH effectiveness after water-based exercise [15,16]. Recently, Rodriguez et al [15] described significant PEH in normotensive women after exercise in the water. In hypertensive subjects, Pontes Junior et al [16] found similar PEH performance when comparing land- with water-based exercise. Considering the scarce and inconclusive data that

are published in the literature, it is still relevant to identify what would be the actual effects of water- or land-based aerobic exercise on normotensive and hypertensive adult subjects. Thus, in this study we aimed to compare the effectiveness of water-based cycle ergometry with land-based cycle ergometry on the post-exercise hypotension response in normotensive, treated and untreated hypertensive subjects.

## Materials and methods

### Subjects

Ten normotensive female subjects (N) and thirty-five hypertensive female patients were included after criteria selection. Hypertensive patients were divided into treated (TH,  $n = 15$ ) or untreated (UH,  $n = 20$ ) groups according to whether the patients received optimized therapy or not, respectively. All included women had no physical limitations. Written informed consent was obtained from all participants; the procedures were performed according to the principles of the Declaration of Helsinki ([www.wma.net/e/policy/b3.htm](http://www.wma.net/e/policy/b3.htm)) and were approved by the Human Research Ethics Committee of Federal University of São Paulo—Paulista Medicine School (834.135/2014). Subjects with recent hospitalization, symptomatic cardiorespiratory disease or cardiac alterations, metabolic syndrome, severe renal or hepatic disease, cognitive impairment, debilitating condition, obesity with inability to exercise and any other medical contraindications to physical exercise were excluded.

### Body composition

The anthropometric variables were assessed by an experienced researcher following the Serra [28] protocol. Stature was measured (in m) to the nearest 0.1 cm criteria by a Cardiomed stadiometer (264 model, Parana, Brazil). Body mass was determined (in kg) to the nearest 0.1 kg using a Filizola scale (Personal Line 150 model), and body mass index (BMI) was calculated ( $\text{kg}/\text{m}^2$ ). Body composition was determined through skinfold thickness using the Lange Skinfold Caliper (Lafayette Instruments, USA). Fat mass (FM) was determined by the following equation ( $\text{FM} = \% \text{Fat} \times \text{weight} \div 100$ ) and the lean mass was estimated by the proportion of fat mass from the total body mass.

### Blood pressure and heart rate

Blood pressure (BP) was measured between 8–10 am, and subjects remained seated for 20 minutes before the protocol [29]. Systolic (SBP) and diastolic BP (DBP) and heart rate (HR) were measured before, during, and immediately after each exercise session using an automated non-invasive BP monitor (Microlife 3AC1-1PC, Microlife, Widnau, Switzerland). Additionally, the mean arterial blood pressure (MBP) was calculated using the equation  $\text{MBP} = \text{DBP} + [\text{SBP} - \text{DBP}] / 3$  and the rate-pressure product (RPP) was evaluated according to the following equation:  $\text{RPP} = \text{HR} * \text{SBP}$ . Resting heart rate and SBP and DBP were assessed on land and in water immersion conditions. In the water, the subjects remained standing for 15 minutes to serve as the control session. After exercise sessions, blood pressure and heart rate were evaluated at 15, 30, 45, 60, 75 and 90 minutes with subjects seated outside the pool. The subjects were instructed to not perform any physical activity and not consume caffeine or alcohol 24 hours before the evaluation.

### Heart rate variability

The heart rate variability (HRV) was evaluated according to previous publications [30]. Briefly, the five minute beat-to-beat HR was recorded using a frequency monitor (Polar Electro Oy

S810i, Kempele, Finland) at a sample rate of 1,000 Hz before (at rest) and ninety minutes after the exercise session, with all measurements captured on land to avoid water immersion-related changes. The RR intervals were recorded and transferred to a computer using software (Polar Precision Performance, version 3.02.007, Kempele, Finland). Data were edited manually by visual inspection in an attempt to avoid artifacts and to avoid affecting the signal. Spectral analysis was performed to assess the auto regressive RR interval variability using the HRV analysis software (version 1.1, Finland). The components of the HRV were obtained by integration of successive heart rate ranges distributed as follows: very low frequency component 0.003–0.04 Hz (VLF, representing the influence of the peripheral vasomotor and renin-angiotensin systems); low frequency component 0.04–0.15 Hz (LF, corresponding to sympathetic and parasympathetic); and high-frequency component 0.15–0.4 Hz (HF: corresponding to vagal input). The results are presented in absolute and normalized powers of the bands excluding VLF, and the LF/HF ratio was calculated to characterize the sympathovagal balance.

### Acute exercise session

Protocols for ergometer biking exercise (on land- or in water-based exercise) were designed to compare the PEH after each modality. Subjects were evaluated with a treadmill exhaustion incremental performance test according to Balke's protocol and a previous publication from our group [19,20]. The maximum oxygen uptake ( $VO_{2max}$ ) was recorded every 30 seconds using a Quinton QMC 000350 (Bothell, WA) gas analyzer. The treadmill test was interrupted when the subject reached their maximum heart rate ( $HR_{max}$ ) minus 10 beats per minute of HR predicted-age criteria. Heart rate was monitored every 30 seconds during the test by 12-lead electrocardiography (Quinton, Q710 Bothell, WA). The exercise prescription was based on  $VO_{2max}$  evaluation to 75% intensity as described by Forjaz [8], with a 45-minute session duration. The subjects were randomly distributed into the two protocols (land- and water-based exercise) in the two different sessions (48 hours between sessions).

The protocol for water-based exercise conditions was performed in a pool with the temperature adjusted to  $30 \pm 1$  °C, as recommended by the Aquatic Exercise Association [31] and the depth of the water was set at the xiphoid process level. The resistance characteristic for the water-based exercise was a result of the natural property of water that was increased following exercise prescription by pedaling velocity. The exercise intensity was monitored by HR (Accurex Plus, Polar Electro, Kempele, Finland) as well as perceived exertion when it reached 6–20 points on the Borg Scale.

### Statistical analyses

Statistical analyses were conducted by SPSS for Windows software (version 15.0, SPSS Inc., Chicago, Illinois, USA). For descriptive statistics, data are presented as mean  $\pm$  SD, and for inferential statistics, data are presented as mean  $\pm$  SEM. The D'Agostino-Pearson test was applied for Gaussian distribution analysis. The comparisons between groups were assessed using one-way and two-way ANOVA with repeated measures and Bonferroni's post hoc tests. The confidence value was established at  $p < 0.05$ .

### Results

The three groups did not differ in age or anthropometric parameters; the hemodynamic parameters as measured on land are presented in Table 1, evidencing increased SBP, DBP and heart rate pressure product (HPP) in the UH group when compared to the N group. ACE-inhibitors were the most prevalent in the TH group; the TH group exhibited no differences in the BP levels in relation to the N group.

**Table 1. General profile of the subjects.**

| Parameters                 | Normotensive | Treated hypertensive | Untreated hypertensive |
|----------------------------|--------------|----------------------|------------------------|
| Age (years)                | 62 ± 2       | 64 ± 2               | 66 ± 2                 |
| <i>Anthropometry</i>       |              |                      |                        |
| Body weight (kg)           | 71 ± 4       | 72 ± 3               | 74 ± 2                 |
| Height (m)                 | 1.60 ± 1     | 1.62 ± 1             | 1.60 ± 1               |
| BMI (kg/m <sup>2</sup> )   | 28 ± 2       | 28 ± 1               | 29 ± 1                 |
| Body fat (%)               | 32 ± 2       | 33 ± 1               | 34 ± 1                 |
| Fat mass (kg)              | 39 ± 4       | 39 ± 3               | 40 ± 2                 |
| Lean mass (kg)             | 32 ± 2       | 33 ± 1               | 34 ± 1                 |
| <i>Hemodynamics</i>        |              |                      |                        |
| HR (bpm)                   | 77 ± 4       | 77 ± 5               | 84 ± 4                 |
| SBP (mmHg)                 | 121 ± 3      | 122 ± 2              | 155 ± 4*               |
| DBP (mmHg)                 | 80 ± 4       | 82 ± 4               | 92 ± 3*                |
| MBP (mmHg)                 | 94 ± 2       | 95 ± 2               | 110 ± 3                |
| HPP (bpm*mmHg)             | 9427 ± 385   | 9598 ± 375           | 130298 ± 6887*         |
| <i>Medicine</i>            |              |                      |                        |
| Period of medicine (years) | ---          | 8 ± 4                | ---                    |
| Diuretics (%)              | ---          | 56%                  | ---                    |
| ACE-inhibitors (%)         | ---          | 88%                  | ---                    |
| Calcium blocker (%)        | ---          | 50%                  | ---                    |

Values are presented as mean ± SD of normotensive, treated hypertensive and untreated hypertensive subjects for body mass index (BMI), heart rate (HR), systolic blood pressure (SBP), diastolic blood pressure (DBP), mean blood pressure and heart rate pressure product (HPP). One-way ANOVA was used, followed by Bonferroni's post hoc test.

\*p<0.001 indicates statistically significant differences between normotensive and treated hypertensive subjects on land.

<https://doi.org/10.1371/journal.pone.0180216.t001>

When evaluating the potential effects of water immersion on the baseline hemodynamics (Table 2), no differences were found in BP or HR in land versus water immersion conditions at rest, suggesting that 15 min of immersion was not enough to significantly alter hemodynamic parameters. Thus, SBP and HPP from the UH group were higher than in the N and TH subjects on land as well as in water conditions.

**Table 2. Hemodynamic parameters at rest before and after immersion into the water for normotensive, treated hypertensive and untreated hypertensive subjects.**

| Parameters     | Normotensive |          | Treated hypertensive |          | Untreated hypertensive |                        |
|----------------|--------------|----------|----------------------|----------|------------------------|------------------------|
|                | Before       | After    | Before               | After    | Before                 | After                  |
| HR (bpm)       | 78±3         | 79±3     | 79±3                 | 78±3     | 86±3                   | 83±2                   |
| SBP (mmHg)     | 122±2        | 119±2    | 123±2                | 120±2    | 153±2*                 | 150±2 <sup>†</sup>     |
| DBP (mmHg)     | 81±2         | 80±2     | 80±2                 | 80±2     | 91±1*                  | 88±1 <sup>†</sup>      |
| MBP (mmHg)     | 95±1         | 93±2     | 94±1                 | 93±1     | 111±1                  | 109±1                  |
| HPP (bpm*mmHg) | 9497±387     | 9417±406 | 9659±301             | 9421±351 | 13074±459*             | 12497±387 <sup>†</sup> |

Values are presented as mean ± SD of normotensive, treated hypertensive and untreated hypertensive subjects for heart rate (HR), systolic blood pressure (SBP), diastolic blood pressure (DBP), mean blood pressure and heart rate pressure product (HPP). Two-way ANOVA was used, followed by Bonferroni's post hoc test.

\*p<0.001 indicates statistically significant differences between normotensive and treated hypertensive subjects on land.

<sup>†</sup>p<0.001 indicates statistically significant differences between normotensive and treated hypertensive subjects in water.

<https://doi.org/10.1371/journal.pone.0180216.t002>

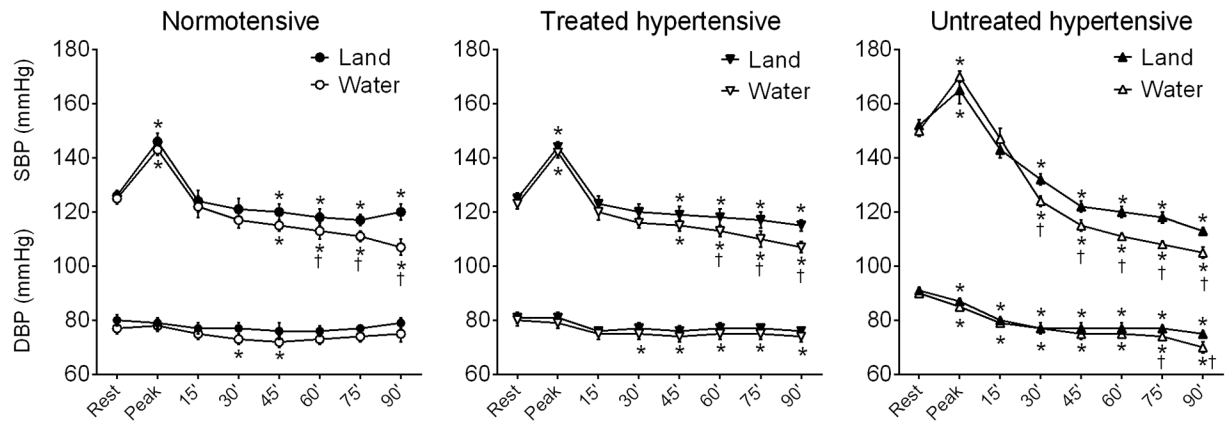

**Fig 1. Effects of a single exercise session on the blood pressure.** Systolic (SBP) and diastolic blood pressures (DBP) were evaluated at rest, at exercise peak and after 15, 30, 45, 60 and 90 minutes after land- or water-ergometry in groups Normotensive, Treated hypertensive and Untreated hypertensive. Values are presented in mean  $\pm$  SEM. \* $p < 0.05$  vs rest; † $p < 0.05$  vs. land-based protocol.

<https://doi.org/10.1371/journal.pone.0180216.g001>

The analyses of land- and water-based exercise at rest, at exercise peak and during recovery (from 15 to 90 min) are presented in Fig 1. In both exercise modalities, a significant increase in SBP was observed from rest to peak exercise in all groups. In DBP, no changes occurred at the peak exercise in the N or TH groups, while a slight reduction was noted for the untreated hypertensive patients.

During recovery, the land-based protocol induced PEH, as indicated by decreasing SBP values after 45 min post-exercise in the N and TH groups and after 30 min post-exercise in the UH group compared to rest measures. However, in the water-based exercise protocol, PEH occurred as early as 30 min after the exercise session in all groups and reached higher hypotensive levels when compared to land-based PEH in the same recovery period. Ninety minutes after the exercise session, PEH was significantly higher in the water-based protocol; additionally, the BP was significantly decreased in relation to that measured at peak exercise. If compared to resting state, MBP decreased significantly more in UH patients than the other groups for both exercise modalities (Fig 2). Moreover, this hypotensive effect was greater when water-based exercise was performed in the N group (land:  $-4.1 \pm 2.5$  mmHg (4% reduction) vs. water:  $-10.0 \pm 2.1$  mmHg (10% reduction),  $p < 0.05$ ) and the UH group (land:  $-20.7 \pm 1.5$  mmHg (18% reduction) vs. water:  $-28.3 \pm 1.1$  mmHg (26% reduction),  $p < 0.05$ ).

Concerning DBP behavior after exercise protocols, while no statistical changes were noted in the land-based protocol in the N and TH groups when compared to rest, DBP was decreased in UH patients as early as 15 min after the exercise session. However, the water-based protocol led to a slight but significant reduction in the N group 30 and 45 min after the exercise session and in TH patients, from 30 to 90 min after the exercise session. Finally, although the water-based protocol induced a reduction in the DPB from 15 to 90 minutes after the exercise sessions, similar to a land-based program, exercise in the water led to a greater hypotensive effect 75 and 90 min post-exercise.

The changes in the HRV parameters assessed at rest and 90 min after exercise sessions are shown in Fig 3. At rest, the spectral bands suggested a predominant sympathetic tone in the UT, a trend to increased LF power (Fig 3A) and LF/HF ratio (Fig 3E) when compared with the normotensive individuals. After 90 minutes of exercise cessation, when compared to the respective baseline value, there was a significant decrease in the LF power and an increase in HF after both exercise modalities for all analyzed groups (Fig 3A and 3C). Moreover, the LF

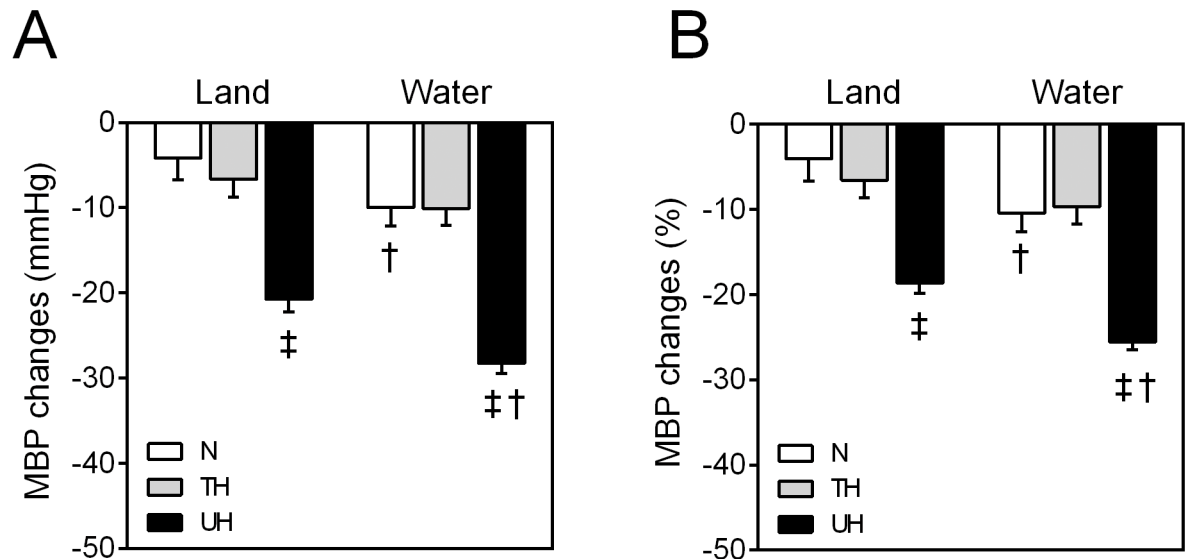

**Fig 2. Absolute and percent of changes in the mean blood pressure after 90 minutes of the exercise session.** A) Absolute of changes in the mean blood pressure (MBP) after exercise session land- or water-based in all groups. B) Percent of changes in the MBP. Values are presented in mean  $\pm$  SEM. † $p < 0.05$  vs N and TH. ‡ $p < 0.05$  vs land-based protocol. (Two-way ANOVA paired by protocol, followed by Bonferroni's post-hoc test).

<https://doi.org/10.1371/journal.pone.0180216.g002>

\HF ratio was significantly reduced 90 min after exercise sessions as well (Fig 3E). When comparing land-versus water-based efforts, the effects on the HRV parameters were greater if water cycling ergometry was performed; the effectiveness of this water-based exercise was significantly higher in the UH patients when compared to that in the TH and N subjects (Fig 3B, 3D and 3F).

## Discussion

This study analyzed the impact of land- and water-based exercise on hemodynamic parameters of normotensive and hypertensive subjects. Regular exercise practice is universally recommended to promote health as well as prevent several diseases. Furthermore, there is emerging evidence supporting the fact that a reduction in blood pressure levels resulting from aerobic exercise is primarily a result of the immediate response to a recent exercise session, i.e., PEH [20,32,33]. Among the elderly, the obese and those with low joint mobility [34], water-based exercise is increasingly popular and recommended. Furthermore, physical activities performed in the water have been prescribed for recovery and injury treatment in athletes [30] with significant cardiovascular benefits [19,20] and decreased exertion intensity [24,34].

To the best of our knowledge, this is the first study aimed to assess PEH in different clinical populations considering different environmental effects on physical exercise sessions. In the present study, higher blood pressure decay after both land- and water-based exercise was observed; however, special attention should address the water environment. The water-based exercise was able to promote an important decay in the MBP after 90 min of exercise by 10%, 10%, and 28% in normotensive, treated hypertensive and untreated hypertensive subjects, respectively. The PEH response of water-based exercise has been evaluated by few studies [15,16]. Rodriguez et al. [15] analyzed the PEH magnitude in normotensive and hypertensive women, describing higher effects after exercise was performed in water than on land; however, no mechanism was described. In contrast, Pontes Junior et al. [16] evaluated treated

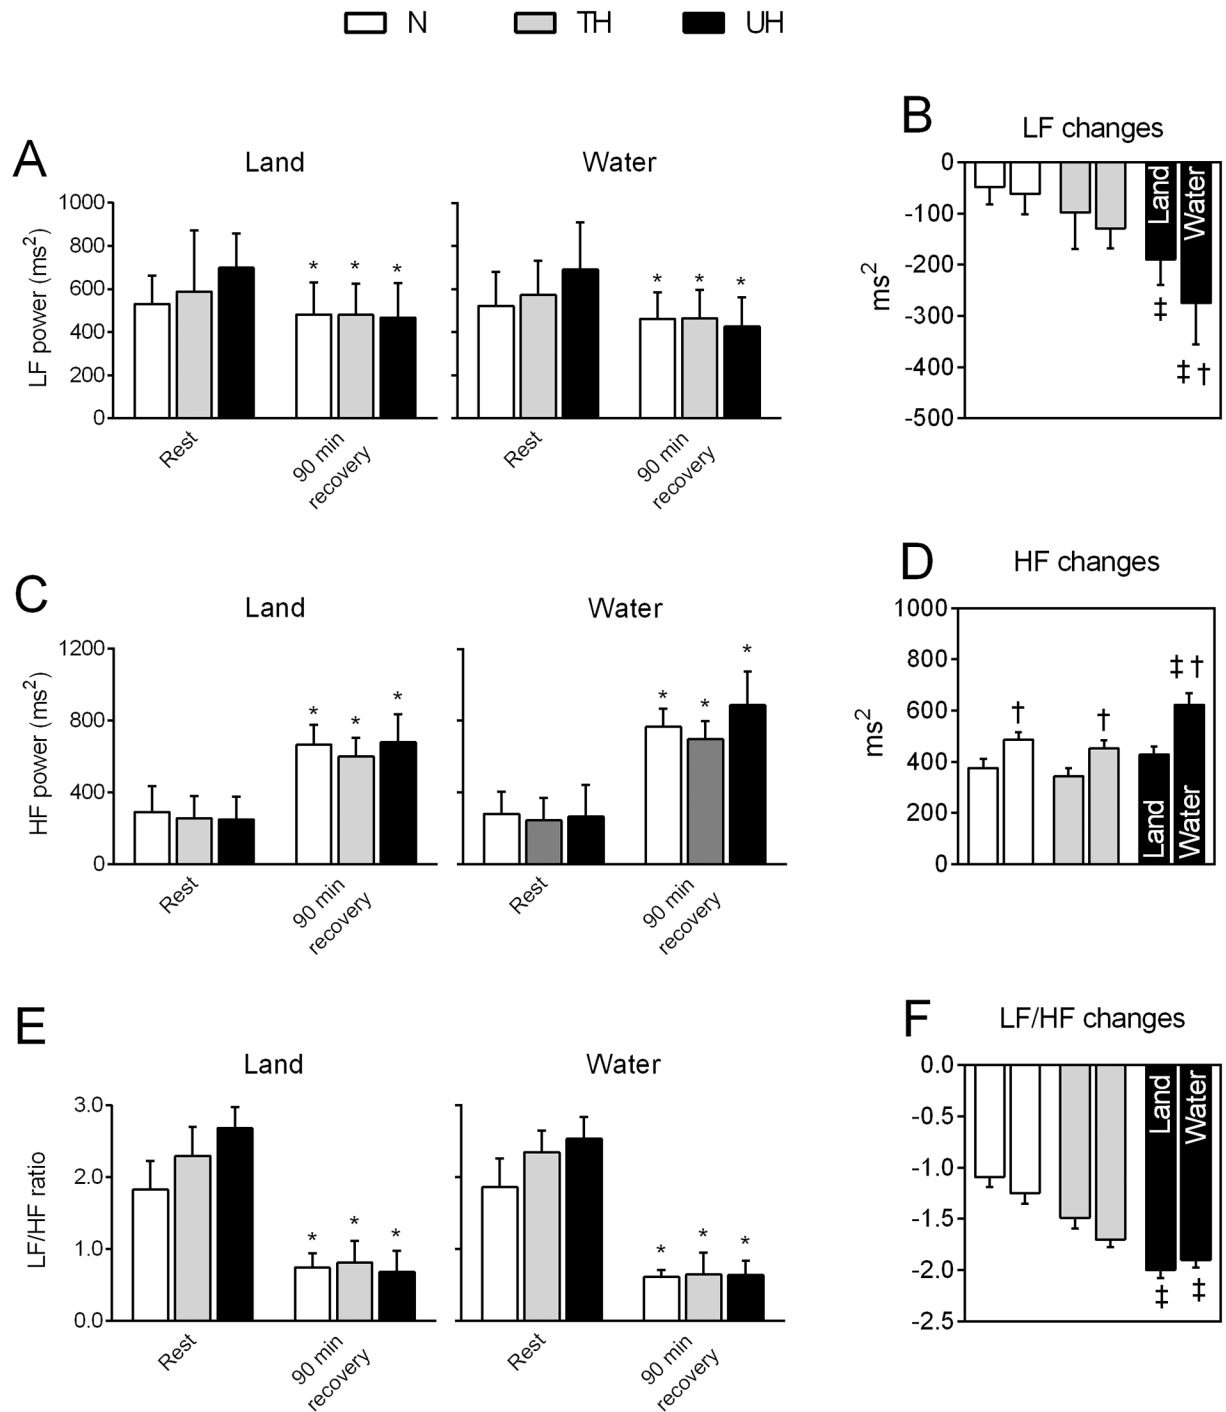

**Fig 3. Heart rate variability changes at rest and after 90 minutes of recovery from land- and water-based exercise session.** In A-B: the low frequency (LF) component, C-D: the high frequency (HF) component and, E-F: their ratio (LF/HF). N: normotensive individuals; TH: treated hypertensive patients; UH: untreated hypertensive patients. Values are mean  $\pm$  SEM. \* $p < 0.05$  vs. rest (Two-way ANOVA paired by groups, followed by Bonferroni's post-hoc test). † $p < 0.05$  vs N and TH. ‡ $p < 0.05$  vs land-based protocol. (Two-way ANOVA paired by protocol, followed by Bonferroni's post-hoc test).

<https://doi.org/10.1371/journal.pone.0180216.g003>



hypertensive subjects and found similar PHE responses after exercise on land and in water with no physiological marker differences for hypotensive effects between land and water sessions.

Additionally, our data demonstrated PEH after 45–60 minutes of land-based exercise, similar to that described in the literature [11], although slightly late when compared with the time that hypotension was observed. Notwithstanding, this effect of hypotensive response is closely related to the initial arterial blood pressure values [9], exercise intensity, modality and duration [9,10,11]. The effectiveness of PEH, even 24 hours after aerobic exercise, is well described with strong scientific evidence in both hypertensive [12,13,15] and normotensive [12] subjects. The main mechanism associated with PEH is the reduction of sympathetic activity [35], reflecting cardiac adrenergic receptor sensitivity attenuation, changes in renin and angiotensin release as a result of decreased catecholamine synthesis [36], lower stroke volume [37], peripheral vascular resistance [38] and synthesis of vasopressin [23] and endothelins [39].

In this study, the HRV of subjects from all groups was evaluated. The rhythmic activity of the sinoatrial node is mainly modulated by the autonomous nervous system, which exhibits a predominant vagal tone in most species, including humans. Since HR may significantly vary as a result of breathing, physical activity or mental stress, or as a reflex component in response to sudden changes in BP, it is well accepted that HRV quantifies the autonomic tone to the heart [40]. As a result, different parameters derived from the HRV analysis were modified in parallel with changes in sympathovagal balance [40].

Moreover, under pathophysiological conditions, a reduced HRV associated with a predominance of the sympathetic component occurs and has been identified as a strong indicator of high cardiovascular risk in healthy individuals and in patients with hypertension, myocardial infarction and atherosclerosis [40]. In our sample, the spectral bands resulting from HRV in the frequency domain assessed at rest suggested the predominance of sympathetic modulation in hypertension, as evidenced by increased LF power and consequent shifting toward a pathophysiological condition of sympathovagal balance (i.e., increased LF/HF) in untreated hypertensive patients compared to control subjects. In addition, it is worth noting that treated hypertensive patients exhibit a trend to changed HRV parameters without statistical significance, suggesting the close relationship between altered HRV and high blood pressure levels. These data reinforce that HRV is likely to be influenced by numerous factors, including the stage of hypertension and pharmacological treatment.

Although the literature is not completely consistent, evidence exists that aerobic exercise in healthy subjects and patients with disease can increase the HRV and vagal tone of the heart [41–43]. Considering a single session of exercise, as used in the present study, a significant drop in the LF component of power associated with an increased HF component can be observed in all groups after both exercise modalities. It is generally well accepted that while the HF band of the HFV spectrum is used to reflect the vagal activity, LF is attributed to modulation of both sympathetic and parasympathetic activities. Thus, although we have not assessed it at the peak of the exercise sessions, it was normally observed that overall, HRV parameters considerably decrease. However, during exercise recovery, HRV is progressively regained as a result of the sudden loss of the central command and baroreflex activation that contribute to this increased vagal tone and heart rate recovery observed throughout the entire recovery period. Additionally, withdrawal of the sympathetic tone and a progressive decrease in the blood pressure levels was noted, characterizing PEH [44].

Lovato et al. [45] reported that although LF decreases and HF increases during exercise recovery, differences have not been found for these HRV variables between rest and the 60-minute recovery period after a single session of aerobic plus resistance exercises in normotensive men. Conversely, it is important to note that the HF power we detected at 90 minutes

of recovery after both land- and water-based ergometry was significantly greater than that assessed at rest, suggesting that more than just a parasympathetic reactivation in PEH occurs. Additionally, the increase in HF and the reduction in LF and LF/HF ratio during recovery were also significantly greater in the water- than in the land-based protocol, reinforcing the effectiveness of ergometry under immersion, especially for hypertensive patients. The exact underlying mechanisms by which exercise improves the vagal tone are not completely clarified. However, potential mediators are angiotensin II and nitric oxide (NO), both mechanisms enrolled in PEH. While angiotensin II, which is known to inhibit cardiac vagal tone, may be suppressed during exercise and after exercise, the increased NO bioavailability during exercise training could increase the vagal activity during recovery [43].

Among all cardiovascular variables, the behavior of blood pressure as measured in water-based exercise conditions is not well described, due to several technical difficulties, especially in procedures in which water is above the waist line. In fact, few studies showed conflicting results when the individual is immersed in the water for practicing exercise. Watenpaugh et al. [46] studied the cardiovascular responses in nine men and ten women for three hours; these subjects were sitting in water that was neck deep, with a temperature of  $34 \pm 0.1^\circ\text{C}$ , showing that only the SBP increased approximately 10 to 12 mmHg in the second and third hour of immersion in both groups and reflecting an increase in pulse pressure. In a paper by Meyer and Bucking [47], no differences were found in BP under immersion in elderly patients with heart failure and control subjects. In contrast, Elvan-Taspinar et al. [48] observed decreased MAP and DAP in women undergoing immersion for three hours in a thermoneutral environment, suggesting that this response was associated with the decay of plasma renin activity and aldosterone response, leading to a decrease in peripheral vascular resistance.

Some data have shown that pulse pressure is directly influenced by immersion depth. Considering the immersion depth suggested by Graef and Kruehl [49], protocols at the shoulders, chest xiphoid, umbilicus, hip and knee lines presented a reduction in the heart rate compared to the land condition. However, in the present study, no differences were found among levels of immersion; similar results were found to other publications [15,16].

In addition, other factors should be noted in water immersion exercise efforts, such as water temperature as described by Park et al. [50]. Significant changes in the hemodynamics were found in different water temperatures and immersion conditions, suggesting that increased venous return, central blood volume and cardiac output, associated with decreased peripheral resistance and changes in the autonomic responses may explain the influence of water temperature on the BP under immersion. Therefore, we aimed to control the water temperature to approximately  $30 \pm 1^\circ\text{C}$  in our study according to the AEA [31] recommendations for aquatic fitness practice and following published protocols [32].

In summary, our study demonstrated that water-ergometry exercise was effective in promoting a higher magnitude of PEH in older women compared to land-based exercise session, with more evident results obtained in hypertensive untreated patients. Although we believe that different intensities, durations and water immersion conditions and its long-term effects should be considered in further studies, the data presented here enlarge the discussion of distinct strategies for the prevention and treatment of hypertension. Specifically, water-based cycling is a potential non-pharmacological strategy to control blood pressure, considering its high effectiveness and low injury and cardiovascular risk. Despite the effectiveness of both protocols in promoting PEH, a special trend was observed in the UT group; the UT group exhibited a higher magnitude of PEH and HRV improvement in water- compared with land-based exercise. As a result, water based-exercise sessions may potentially be recommended for blood pressure control and autonomic modulation with a consequent reduction of cardiovascular risk, especially due to the PEH-related effects.

## Supporting information

**S1 Fig. Graphical abstract for educational purposes.**

(PDF)

**S1 File. Data on changes in blood pressure during and after the exercise session.**

(XLSX)

**S2 File. Individual data of absolute and percent changes in blood pressure.**

(XLSX)

**S3 File. Data on heart rate variability in all groups.**

(XLSX)

## Author Contributions

**Conceptualization:** Danilo Sales Bocalini, Andrey Jorge Serra, Paulo José Ferreira Tucci, Leonardo dos Santos.

**Data curation:** Danilo Sales Bocalini, Alexandre Lopes Evangelista.

**Formal analysis:** Danilo Sales Bocalini, Marco Bergamin, Alexandre Lopes Evangelista, Roberta Luksevicius Rica, Francisco Luciano Pontes, Aylton Figueira, Andrey Jorge Serra, Emilly Martinelli Rossi, Paulo José Ferreira Tucci, Leonardo dos Santos.

**Funding acquisition:** Danilo Sales Bocalini.

**Investigation:** Danilo Sales Bocalini, Marco Bergamin, Alexandre Lopes Evangelista, Roberta Luksevicius Rica, Francisco Luciano Pontes, Aylton Figueira.

**Methodology:** Danilo Sales Bocalini, Alexandre Lopes Evangelista, Roberta Luksevicius Rica, Francisco Luciano Pontes, Aylton Figueira, Andrey Jorge Serra, Emilly Martinelli Rossi, Paulo José Ferreira Tucci, Leonardo dos Santos.

**Project administration:** Danilo Sales Bocalini, Andrey Jorge Serra, Paulo José Ferreira Tucci, Leonardo dos Santos.

**Resources:** Danilo Sales Bocalini.

**Software:** Danilo Sales Bocalini, Leonardo dos Santos.

**Supervision:** Danilo Sales Bocalini.

**Validation:** Danilo Sales Bocalini, Leonardo dos Santos.

**Visualization:** Danilo Sales Bocalini, Marco Bergamin, Emilly Martinelli Rossi, Leonardo dos Santos.

**Writing – original draft:** Danilo Sales Bocalini, Marco Bergamin, Alexandre Lopes Evangelista, Roberta Luksevicius Rica, Francisco Luciano Pontes, Aylton Figueira.

**Writing – review & editing:** Danilo Sales Bocalini, Emilly Martinelli Rossi, Leonardo dos Santos.

## References

1. Pescatello LS, Franklin BA, Fagard R, Farquhar WB, Kelley GA, Ray CA. American College of Sports Medicine position stand. Exercise and hypertension. *Med Sci Sports Exerc* 2004; 36(3):533–553. PMID: [15076798](https://pubmed.ncbi.nlm.nih.gov/15076798/)

2. World Health Organization. The World Health Report 2002: Risks to Health Geneva: World Health Organization, 2002.
3. Kanavos P, Ostergren J, Weber MA. High blood pressure and health policy: Where we are and where we need to go next. New York, USA: Ruder Finn Inc; 2007.
4. Indicators of risk and protective factors. Brazil: Ministry of Health, IDB 2010. <http://tabnet.datasus.gov.br/cgi/tabnet.exe?idb2010/g02.def>.
5. Jardim PC, Souza WK, Lopes RD, Brandão AA, Malachias MV, Gomes MM et al. I RBH—First Brazilian Hypertension Registry. *Arq Bras Cardiol* 2016; 107(2):93–98. <https://doi.org/10.5935/abc.20160120> PMID: 27627639
6. VI Brazilian Guidelines on Hypertension. *Arq Bras Cardiol* 2010; 95(1 Suppl):1–51. PMID: 21085756
7. Casonatto J, Polito MD. Post-exercise hypotension: a systematic review. *Rev Bras Med Esporte* 2009; 15(2):151–157.
8. Forjaz CL, Cardoso CG Jr, Rezk CC, Santaella DF, Tinucci T. Post-exercise hypotension and hemodynamics: the role of exercise intensity. *J Sports Med Phys Fitness* 2004; 44(1):54–62. PMID: 15181391
9. Rondon MUPB, Alves MJ, Braga AM, Teixeira OT, Barretto AC, Krieger EM, et al. Postexercise blood pressure reduction in elderly hypertensive patients. *J Am Coll Cardio* 2002; 39(4):676–682.
10. Pescatello LS, Fargo AE, Leach CN Jr, Scherzer HH. Short-term effect of dynamic exercise on arterial blood pressure. *Circulation* 1991; 83(5):1557–1561. PMID: 2022015
11. MacDonald JR, MacDougall JD, Hogben CD. The effects of exercise duration on post-exercise hypotension. *J Hum Hypertens* 1999; 14(2):125–129.
12. Wallace JP, Bogle PG, King BA, Krasnoff JB, Jastremski CA. The magnitude and duration of ambulatory blood pressure reduction following acute exercise. *J Hum Hypertens* 1999; 13(6):361–366. PMID: 10408585
13. Quinn TJ. Twenty-four hour, ambulatory blood pressure responses following acute exercise: impact of exercise intensity. *J Hum Hypertens* 2000; 14(9):547–553. PMID: 10980585
14. Anunciação PG, Polito MD. A Review on Post-exercise Hypotension in Hypertensive Individuals. *Arq Bras Cardiol* 2011; 96(5):e100–109. PMID: 21359479
15. Rodriguez D, Silva V, Prestes J, Rica RL, Serra AJ, Bocalini DS, et al. Hypotensive response after water-walking and land-walking exercise sessions in normotensive trained and untrained women. *Int J Gen Med* 2011; 4:549–454. <https://doi.org/10.2147/IJGM.S23094> PMID: 21887107
16. Pontes FL Jr, Bacurau RF, Moraes MR, Navarro F, Casarini DE, Pesquero JL, et al. Kallikrein kinin system activation in post-exercise hypotension in water running of hypertensive volunteers. *Int Immunopharmacol* 2008; 8(2):261–266. <https://doi.org/10.1016/j.intimp.2007.09.001> PMID: 18182237
17. Fitz-Simon N, Bennett K, Feely J. A review of studies of adherence with antihypertensive drugs using prescription databases. *Ther Clin Risk Manag* 2005; 1(2): 93–106. PMID: 18360549
18. Fernhall B, Manfredi TG, Congdon K. Prescribing water-based exercise from treadmill and arm ergometry in cardiac patients. *Med Sci Sports Exerc* 1992; 24(1):139–143. PMID: 1548988
19. Bartels EM, Lund H, Hagen KB, Dagf inrud H, Christensen R, Danneskiold-Samsøe B. Aquatic exercise for the treatment of knee and hip osteoarthritis. *Cochrane Database Syst Rev* 2007; 17:CD005523.
20. Bocalini DS, Serra AJ, Murad N, Levy RF. Water- versus land-based exercise effects on physical fitness in older women. *Geriatr Gerontol Int* 2008; 8:265–271. <https://doi.org/10.1111/j.1447-0594.2008.00485.x> PMID: 19149838
21. Bocalini DS, Serra AJ, Rica RL, dos Santos L. Repercussions of training and detraining by water-based exercise on functional fitness and quality of life: a short-term follow-up in healthy older women. *Clinics (São Paulo)* 2010; 65(12):1305–1309.
22. Lin YC. Circulatory functions during immersion and breath-hold dives in humans. *Undersea Biomedical Research* 1984; 11(2): 123–138. PMID: 6385430
23. Epstein M. Renal effects of head-out water immersion in humans: a 15-year update. *Physiol Rev* 1992; 72(3): 563–621. PMID: 1626032
24. Gabrielsen A, Warberg J, Christensen NJ, Bie P, Stadeager C, Pump B, et al. Arterial pulse pressure and vasopressin release during graded water immersion in humans. *Am J Physiol Regul Integr Comp Physiol* 2000; 278(6): R1583–1588. PMID: 10848527
25. Reilly TR, Dowzer NC, Cable NT. The physiology of deep-water running. *J Sports Sci* 2003; 21(12):959–972. <https://doi.org/10.1080/02640410310001641368> PMID: 14748454
26. Gabrielsen A, Videbaek R, Johansen LB, Warberg J, Christensen NJ, Norsk P. Immediate baroreflex-neuroendocrine interactions in humans during graded water immersion. *J Gravit Physiol* 1996; 3(2):22–3. PMID: 11540268

27. Rodriguez D, Silva V, Prestes J, Rica RL, Serra AJ, Bocalini DS, et al. Hypotensive response after water-walking and land-walking exercise sessions in normotensive trained and untrained women. *Int J Gen Med* 2011; 4: 549–554. <https://doi.org/10.2147/IJGM.S23094> PMID: 21887107
28. Serra AJ, do Amaral AM, Rica RL, Barbieri NP, Junior DR, Junior JAS, et al. Determination of body density by generalized equations: easiness and simplification in the method. *ConScientiae Saúde* 2009; 8:19–24.
29. Pickering TG, Hall JE, Appel LJ, Falkner BE, Graves J, Hill MN, et al. Recommendations for blood pressure measurement in humans and experimental animals: part 1. Blood pressure measurement in humans: a statement for professionals from the subcommittee of professional and public education of the American Heart Association Council on High Blood Pressure Research. *Hypertension* 2005; 45 (1):142–161. <https://doi.org/10.1161/01.HYP.0000150859.47929.8e> PMID: 15611362
30. Perkins SE, Jelínek HF, Al-Aubaidy HA, de Jong B. Immediate and long term effects of endurance and high intensity interval exercise on linear and nonlinear heart rate variability. *J Sci Med Sport* 2016; 16 (S1440–2440):30152–30159.
31. Aquatic Exercise Association. *Aquatic Fitness Manual*. 5th ed. Champaign, IL: Human Kinetics; 2006.
32. Guimarães GV, Cruz LG, Tavares AC, Dorea EL, Fernandes-Silva MM, Bocchi EA. Effects of short-term heated water-based exercise training on systemic blood pressure in patients with resistant hypertension: a pilot study. *Blood Press Monit* 2013; 18(6):342–345. <https://doi.org/10.1097/MBP.0000000000000000> PMID: 24192849
33. Manikonda JP, Störk S, Tögel S, Lobmüller A, Grünberg I, Bedel S, Schardt F, Angermann CE, Jahns R, Voelker W. Contemplative meditation reduces ambulatory blood pressure and stress-induced hypertension: a randomized pilot trial. *J Hum Hypertens* 2008; 22(2):138–40. <https://doi.org/10.1038/sj.jhh.1002275> PMID: 17823597
34. Takeshima N, Rogers ME, Watanabe E. Water-based exercise improves health-related aspects of fitness in older women. *Medicine and Science in Sports and Exercise* 2002; 33(3): 544–551.
35. Kulics JM, Collins HL, DiCarlo SE. Post exercise hypotension is mediated by reductions in sympathetic nerve activity. *Am J Physiol* 1999; 276(1):27–32.
36. Pontes FL Junior, Prestes J, Leite RD, Rodriguez D. Influence of aerobic exercise on physiopathological mechanisms of systemic hypertension. *Rev. Bras. Ciênc. Esporte* 2010; 32 (2–4):229–244.
37. Brandão Rondon MU, Alves MJ, Braga AM, Teixeira OT, Barretto AC, Krieger EM et al. Postexercise blood pressure reduction in elderly hypertensive patients. *J Am Coll Cardiol*. 2002; 39(4):676–682. PMID: 11849868
38. Halliwill JR. Mechanisms and clinical implications of post-exercise hypotension in humans. *Exerc Sport Sci Rev* 2001; 29(2):65–70.
39. Goto C, Higashi Y, Kimura M, Noma K, Hara K, Nakagawa K, et al. Effect of different intensities of exercise on endothelium-dependent vasodilation in humans: role of endothelium-dependent nitric oxide and oxidative stress. *Circulation* 2003; 108(5):530–535. <https://doi.org/10.1161/01.CIR.0000080893.55729.28> PMID: 12874192
40. Malliani A. Heart rate variability: from bench to bedside. *Eur J Intern Med* 2005; 16(1):12–20. <https://doi.org/10.1016/j.ejim.2004.06.016> PMID: 15733815
41. Tuomainen P, Peuhkurinen K, Kettunen R, Rauramaa R. Regular physical exercise, heart rate variability and turbulence in a 6-year randomized controlled trial in middle-aged men: the DNASCO study. *Life Sci* 2005; 77(21):2723–2734. <https://doi.org/10.1016/j.lfs.2005.05.023> PMID: 15978638
42. Cozza IC, Di Sacco TH, Mazon JH, Salgado MC, Dutra SG, Cesarino EJ, et al. Physical exercise improves cardiac autonomic modulation in hypertensive patients independently of angiotensin-converting enzyme inhibitor treatment. *Hypertens Res* 2012; 35(1):82–87. <https://doi.org/10.1038/hr.2011.162> PMID: 21956728
43. Routledge FS, Campbell TS, McFetridge-Durdle JA, Bacon SL. Improvements in heart rate variability with exercise therapy. *Can J Cardiol* 2010; 26(6):303–312. PMID: 20548976
44. Kulics JM, Collins HL, DiCarlo SE. Postexercise hypotension is mediated by reductions in sympathetic nerve activity. *Am J Physiol* 1999; 276(1 Pt 2):H27–32. PMID: 9887013
45. Lovato NS; Anunciacao PG, Polito MD. Blood pressure and heart rate variability after aerobic and weight exercises performed in the same session. *Rev Bras Med Esporte* 2012; 18(1):22–25.
46. Watenpaugh DE, Pump B, Bie P, Norsk P. Does gender influence human cardiovascular and renal responses to water immersion? *Journal of Applied Physiology* 2000; 89(2):621–628.
47. Meyer K, Bücking J. Exercise in heart failure: should aqua therapy and swimming be allowed? *Med Sci Sports Exerc* 2004; 36(12):2017–223. PMID: 15570134

48. Elvan-Taspinar A, Franx A, Elprat CC, Bruinse HW, Koomans HA. Water immersion in preeclampsia. *American Journal of Obstetrics and Gynecology* 2006; 195(6):1590–1595. <https://doi.org/10.1016/j.ajog.2006.05.007> PMID: [16875643](https://pubmed.ncbi.nlm.nih.gov/16875643/)
49. Graef FI, Kruel LFM. Heart rate and perceived exertion at aquatic environment: differences in relation to land environment and applications for exercise prescription—a review. *Rev Bras Med Esporte* 2006; 12(4):221–228.
50. Park KS, Choi JK, Park YS. Cardiovascular regulation during water immersion. *Appl Human Sci* 1999; 18(6):233–241. PMID: [10675972](https://pubmed.ncbi.nlm.nih.gov/10675972/)
