# Supplementary material for: Post-exercise hypotension and heart rate variability response after water- and land-ergometry exercise in hypertensive patients
Source: PubMed Central journal article supplement (PMC5489191; doi:10.1371/journal.pone.0180216), 2017-06-28
Supplement: pone.0180216.s001.pdf [file pone.0180216.s001.pdf]

# Post-exercise hypotension in Hypertensive patients

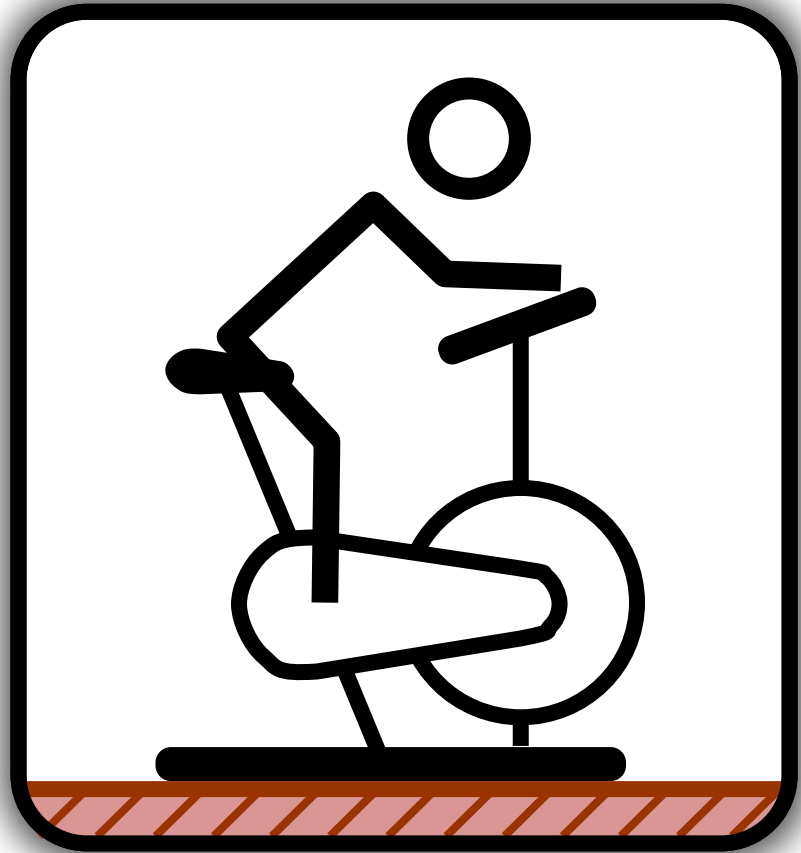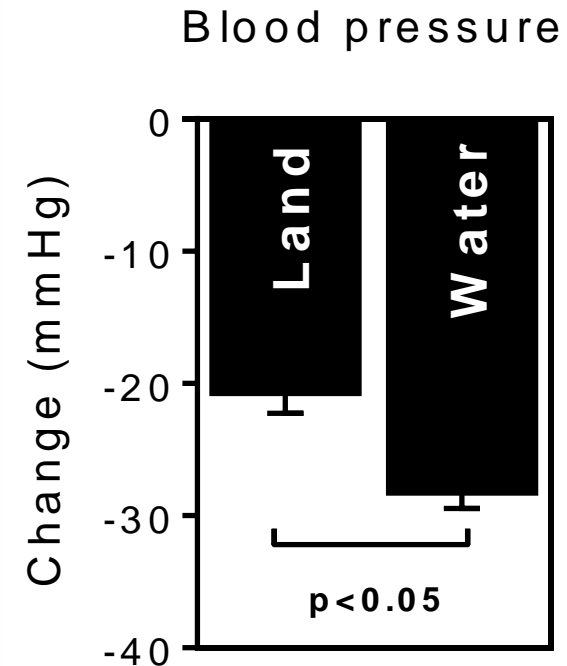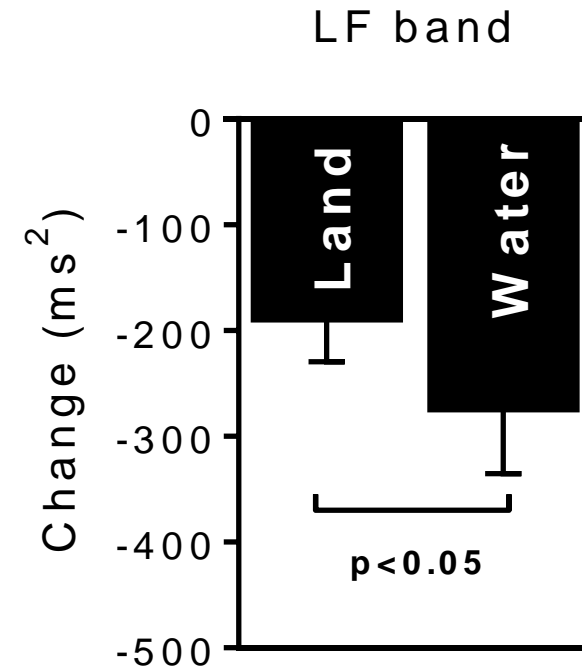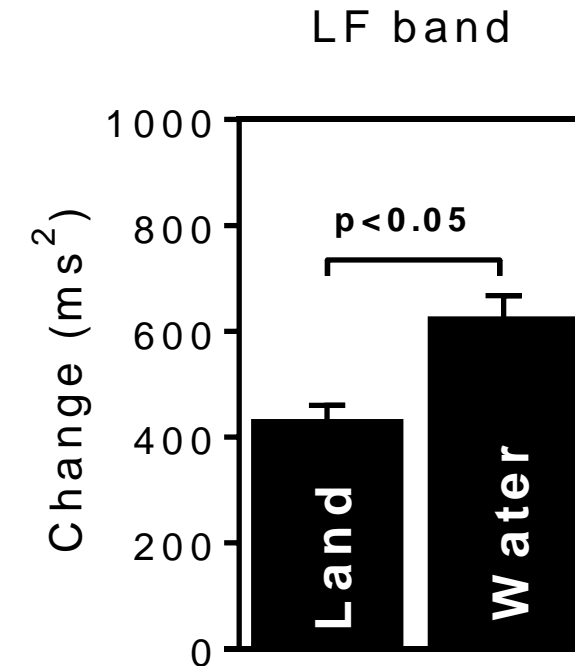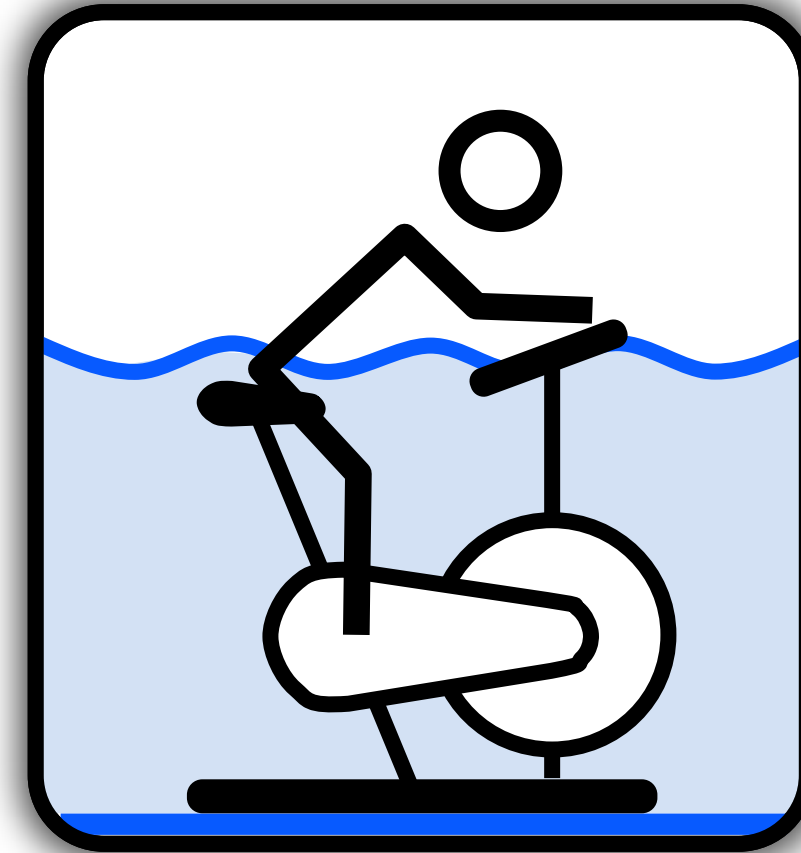

**Land-based *versus* Water-based  
Ergometric cycling**
