# Supplementary material for: Post-exercise hypotension and heart rate variability response after water- and land-ergometry exercise in hypertensive patients
Source: PLoS One. 2017 Jun 28;12(6):e0180216. doi: 10.1371/journal.pone.0180216 (PMC5489191; doi:10.1371/journal.pone.0180216)
Supplement: S1 File — (XLSX) [file pone.0180216.s002.xlsx]

## Sheet: Planilha1
		N land		N water		TH land		TH water		UH land		UH water
Rest	-15	126	2	125	2	125	2	123	2	152	2	150	2
Peak	0	146	3	143	2	144	2	142	2	165	5	170	2
15'	15	124	4	122	4	123	3	120	3	143	3	147	4
30'	30	121	4	117	3	120	3	116	2	132	2	124	2
45'	45	120	3	115	2	119	3	115	2	122	2	115	2
60'	60	118	3	113	3	118	3	113	2	120	2	111	1
75'	75	117	2	111	2	117	3	110	3	118	2	108	1
90'	90	120	3	107	3	115	2	107	2	113	1	105	2

## Sheet: Planilha2
	N land		N water		TH land		TH water		UH land		UH water
Rest	80	2	77	2	81	2	80	2	91	1	90	1
Peak	79	2	78	2	81	2	79	2	87	1	85	1
15'	77	2	75	2	76	1	75	2	80	1	79	1
30'	77	2	73	2	77	2	75	2	77	2	77	1
45'	76	3	72	2	76	2	74	2	77	2	75	2
60'	76	2	73	2	77	2	75	2	77	2	75	1
75'	77	1	74	2	77	1	75	2	77	1	74	1
90'	79	2	75	3	76	1	74	2	75	1	70	2
