# Supplementary material for: Post-exercise hypotension and heart rate variability response after water- and land-ergometry exercise in hypertensive patients
Source: PLoS One. 2017 Jun 28;12(6):e0180216. doi: 10.1371/journal.pone.0180216 (PMC5489191; doi:10.1371/journal.pone.0180216)
Supplement: S2 File — (XLSX) [file pone.0180216.s003.xlsx]

## Sheet: Planilha1
	N
Land	0	3	6	1	-15	-19	6	-9	-3	-12	-4
Water	-15	-6	1	-3	-19	-19	-9	-19	-6	-5	-10
TH
0	3	6	1	-15	-19	6	-9	-3	-12	-3	-15	-11	-15	-14	-6.7
0	-1	6	1	-19	-19	-9	-19	-9	-15	-14	-10	-11	-15	-18	-9.5
UH
-19	-7	-23	-16	-22	-19	-16	-26	-28	-22	-8	-21	-26	-15	-35	-18	-18	-19	-23	-34	-20.8
-32	-21	-26	-26	-22	-28	-31	-26	-37	-27	-23	-42	-25	-29	-27	-31	-28	-19	-34	-32	-28.3

## Sheet: Planilha2
	N land		N water		TH land		TH water		UH land		UH water
Rest	80	2	77	2	81	2	80	2	91	1	90	1
Peak	79	2	78	2	81	2	79	2	87	1	85	1
15'	77	2	75	2	76	1	75	2	80	1	79	1
30'	77	2	73	2	77	2	75	2	77	2	77	1
45'	76	3	72	2	76	2	74	2	77	2	75	2
60'	76	2	73	2	77	2	75	2	77	2	75	1
75'	77	1	74	2	77	1	75	2	77	1	74	1
90'	79	2	75	3	76	1	74	2	75	1	70	2
