# Supplementary material for: Post-exercise hypotension and heart rate variability response after water- and land-ergometry exercise in hypertensive patients
Source: PLoS One. 2017 Jun 28;12(6):e0180216. doi: 10.1371/journal.pone.0180216 (PMC5489191; doi:10.1371/journal.pone.0180216)
Supplement: S3 File — (XLSX) [file pone.0180216.s004.xlsx]

## Sheet: LF
LF land
	N		TH		UH
Rest	530	134	588	284	699	159
90 min	482	148	480	145	468	159
recovery
LF water
	N		TH		UH
Rest	524	156	574	159	691	221
90 min	462	123	465	131	426	135
recovery
LF changes
	N		TH		UH
Land	-48	33.5	-98	71	-190	49.75
Water	-62	39	-129	39.75	-275	80.25

## Sheet: HF
HF land
	N		TH		UH
Rest	289	144	255	125	249	125
90 min	665	112	599	105	678	156
recovery
HF water
	N		TH		UH
Rest	281	124	244	124	264	179
90 min	767	101	697	101	887	187
recovery
HF changes
	N		TH		UH
Land	376	36	344	31.25	429	31.25
Water	486	31	453	31	623	44.75

## Sheet: LF;HF ratio
	N		TH		UH
Rest	1.83	0.4	2.3	0.4	2.68	0.3
90 min	0.74	0.2	0.81	0.3	0.68	0.3
recovery
	N		TH		UH
Rest	1.86	0.4	2.35	0.3	2.54	0.3
90 min	0.61	0.1	0.65	0.3	0.64	0.2
recovery
	N		TH		UH
Land	-1.09	0.1	-1.49	0.1	-2	0.075
Water	-1.25	0.1	-1.7	0.075	-1.9	0.075
